# Supplementary material
Source: publisher site journal article supplement (https://www.e-cmh.org/upload/media/cmh-2023-0035-Supplementary-Table-2.pdf)
Supplement: Supplementary file 1 [file cmh-2023-0035-Supplementary-Table-2.pdf]

**Supplementary Table 2.** Comparison of lifestyle factors and laboratory data according to the presence of NAFLD and obesity in men

| Variable                     | Without obesity    |                    |         | With obesity         |                     |         |
|------------------------------|--------------------|--------------------|---------|----------------------|---------------------|---------|
|                              | No NAFLD           | NAFLD              | P-value | No NAFLD             | NAFLD               | P-value |
| Number (%)                   | 3,286 (44.0)       | 1,278 (17.1)       |         | 1,046 (14.0)         | 1,860 (24.8)        |         |
| Age (yr)                     | 54.2±9.4           | 54.1±8.4           | 0.654   | 54.0±9.4             | 52.3±9.0**          | <0.001  |
| Smoking (%)                  |                    |                    | <0.001  |                      |                     | <0.001  |
| Current                      | 27.1               | 33.0               |         | 27.6*                | 33.7                |         |
| Ex-smoker                    | 43.8               | 44.5               |         | 46.6                 | 44.8                |         |
| Regular aerobic exercise (%) | 48.8               | 43.0               | <0.001  | 51.1**               | 40.6                | <0.001  |
| Total METs (min/week)        | 1,188 (594, 2,376) | 1,035 (438, 1,980) | <0.001  | 1,285 (615, 2,457)** | 990 (396, 2,100)    | <0.001  |
| Resistance E (%)             | 42.5               | 36.3               | 0.013   | 42.8*                | 33.4                | 0.047   |
| SBP (mmHg)                   | 121.3±12.9         | 123.5±12.3         | <0.001  | 126.2±12.3**         | 128.3±12.8**        | <0.001  |
| DBP (mmHg)                   | 77.2±9.9           | 79.5±9.9           | <0.001  | 80.6±9.6*            | 82.5±10.1**         | <0.001  |
| FPG (mg/dL)                  | 97.5±14.0          | 104.0±20.9         | <0.001  | 100.0±20.8**         | 105.6±20.8*         | <0.001  |
| HbA1c (%)                    | 5.52±0.51          | 5.79±0.75          | <0.001  | 5.58±0.50**          | 5.87±0.77*          | <0.001  |
| LDL-C (mg/dL)                | 120.8±28.7         | 126.5±31.1         | <0.001  | 122.2±30.8*          | 128.1±32.2          | <0.001  |
| HDL-C (mg/dL)                | 54.7±13.2          | 47.4±10.7          | <0.001  | 49.5±11.2**          | 45.1±9.8**          | <0.001  |
| TG (mg/dL)                   | 92 (69, 124)       | 128 (95, 175)      | <0.001  | 109 (81, 143)        | 141 (105, 192)      | <0.001  |
| AST (IU/L)                   | 26.6±10.1          | 28.5±12.2          | <0.001  | 27.1±9.7*            | 31.6±13.6*          | <0.001  |
| ALT (IU/L)                   | 22.9±16.7          | 30.7±16.7          | <0.001  | 26.0±14.2**          | 38.7±23.2*          | <0.001  |
| r-GT (IU/L)                  | 20 (15, 28)        | 27 (20, 38)        | <0.001  | 24 (17, 36)*         | 31 (23, 46)**       | <0.001  |
| hsCRP (mg/dL)                | 0.04 (0.02, 0.08)  | 0.06 (0.03, 0.12)  | <0.001  | 0.05 (0.03, 0.11)*   | 0.08 (0.04, 0.16)** | <0.001  |
| Insulin (μIU/L)              | 3.2 (2.1, 5.1)     | 5.5 (3.4, 7.4)     | <0.001  | 5.1 (3.2, 7.1)*      | 7.4 (5.5, 10.2)**   | <0.001  |
| HOMA-IR                      | 0.78 (0.48, 1.25)  | 1.36 (0.85, 1.94)  | <0.001  | 1.22 (0.78, 1.77)*   | 1.88 (1.34, 2.67)** | <0.001  |
| Hypertension (%)             | 27.3               | 36.7               | <0.001  | 42.1*                | 50.8**              | <0.001  |
| Diabetes (%)                 | 7.7                | 17.2               | <0.001  | 8.7**                | 19.6                | <0.001  |

Values are presented as mean±standard deviation or median (interquartile range).

NAFLD, non-alcoholic fatty liver disease; MET, metabolic equivalent of task; SBP, systolic blood pressure; DBP, diastolic blood pressure; FPG, fasting plasma glucose; HbA1c, glycated hemoglobin; LDL, low-density lipoprotein; HDL, high-density lipoprotein; TG, triglyceride; hsCRP, high-sensitivity C-reactive protein; HOMA-IR, homeostasis model assessment for insulin resistance.

P-values represent comparisons between the groups with and without NAFLD by paired t-tests or Mann-Whitney U-tests for continuous variables and by chi-squared tests for categorical variables. The symbol (\*) denotes a comparison vs. the NAFLD without obesity group (\*P<0.05, \*\*P<0.001).
